# Supplementary material for: Transcription of lncRNA prt, clustered prt RNA sites for Mmi1 binding, and RNA polymerase II CTD phospho-sites govern the repression of pho1 gene expression under phosphate-replete conditions in fission yeast
Source: PubMed Central journal article supplement — RNA. 2016 Jul;22(7):1011–25. doi: 10.1261/rna.056515.116 (PMC4911910; doi:10.1261/rna.056515.116), 2016-07
Supplement: supp_056515.116_Supp_Figs_Tables.pdf [file supp_056515.116_Supp_Figs_Tables.pdf]

Supplemental Material

**Transcription of lncRNA *pvt*, clustered *pvt* RNA sites for Mmi1 binding, and RNA polymerase II CTD phospho-sites govern the repression of *pho1* gene expression under phosphate-replete conditions in fission yeast**

Debashree Chatterjee, Ana M. Sanchez, Yehuda Goldgur, Stewart Shuman, and Beate Schwer

Table S1

Figures S1 and S2

Table S1  
Crystallographic data and refinement statistics

|                                                                     | SeMet-Mmi1(311–488)             | Mm1(311–488)                     | Mmi1(319–488)                    |
|---------------------------------------------------------------------|---------------------------------|----------------------------------|----------------------------------|
| <b>Data collection</b>                                              |                                 |                                  |                                  |
| Beamline                                                            | APS 24-ID-C                     | APS 24-ID-E                      | APS 24-ID-E                      |
| Space group                                                         | $P2_12_12_1$                    | $P2_12_12_1$                     | $P3_12_1$                        |
| Cell dimensions<br>a, b, c (Å)<br>$\alpha$ , $\beta$ , $\gamma$ (°) | 49.8, 79.7, 196.0<br>90, 90, 90 | 49.8, 79.6, 195.2<br>90, 90, 90  | 58.0, 58.0, 370.8<br>90, 90, 120 |
| Resolution (Å)                                                      | 50–2.05 (2.1–2.05)              | 50–1.75 (1.8–1.75)               | 50–1.95 (2.00–1.95)              |
| Wavelength (Å)                                                      | 0.9795                          | 0.9792                           | 0.9792                           |
| $R_{\text{pim}}$                                                    | 0.056 (0.985)                   | 0.022 (0.115)                    | 0.040 (0.362)                    |
| CC(1/2)                                                             | 0.995 (0.466)                   | 0.998 (0.969)                    | 0.996 (0.652)                    |
| $\langle I \rangle / \langle \sigma \rangle$                        | 15.2 (1.1)                      | 24.4 (4.3)                       | 24.8 (2.9)                       |
| Completeness (%)                                                    | 98.2 (94.8)                     | 99.7 (98.4)                      | 86.3 (58.0)                      |
| Redundancy                                                          | 3.3 (3.2)                       | 6.5 (5.5)                        | 3.3 (2.7)                        |
| Unique reflections                                                  | 49667                           | 78868                            | 46677                            |
| <b>Phasing</b>                                                      |                                 |                                  |                                  |
| Number of Se sites                                                  | 24                              |                                  |                                  |
| Figure of merit                                                     | 0.55                            |                                  |                                  |
| <b>Refinement</b>                                                   |                                 |                                  |                                  |
| $R_{\text{work}} / R_{\text{free}}$                                 |                                 | 0.187 / 0.205<br>(0.219 / 0.237) | 0.205 / 0.251<br>(0.257 / 0.291) |
| $B$ -factors (Å <sup>2</sup> ) Average/Wilson                       |                                 | 29.8 / 21.1                      | 34.2 / 26.4                      |
| RMS deviations<br>bond lengths (Å)<br>bond angles (°)               |                                 | 0.005<br>0.797                   | 0.008<br>1.01                    |
| Ramachandran plot<br>% favored<br>% allowed<br>outliers             |                                 | 97.8<br>2.2<br>none              | 98.8<br>1.2<br>none              |
| <b>Model contents</b>                                               |                                 |                                  |                                  |
| Protomers / ASU                                                     |                                 | 4                                | 4                                |
| Protein residues                                                    |                                 | 687                              | 668                              |
| Water                                                               |                                 | 846                              | 471                              |
| <b>PDB ID</b>                                                       |                                 | 5H8A                             | 5HFZ                             |

Values in parentheses refer to the highest resolution shell.

$R_{\text{free}}$  set consists of 5% of data chosen randomly against which structures were not refined.

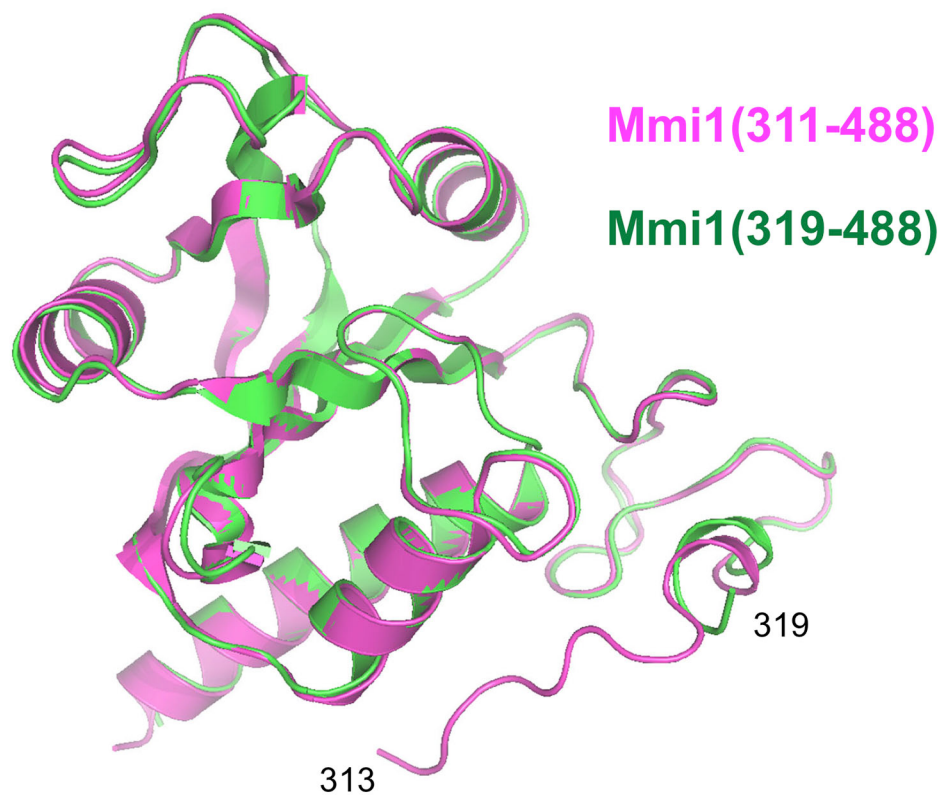

Figure S1. **Superposition of the structures of Mmi1(311-488) and Mmi1(319-488).** Although the shorter YTH domain Mmi1(319-488) crystallized in a different lattice than Mmi1(311-488), the two structures were virtually identical. In particular, subtraction of the <sup>311</sup>STPPPLNF<sup>318</sup> peptide had no apparent effect on the structure of the residual N peptide from aa 319 to 347.

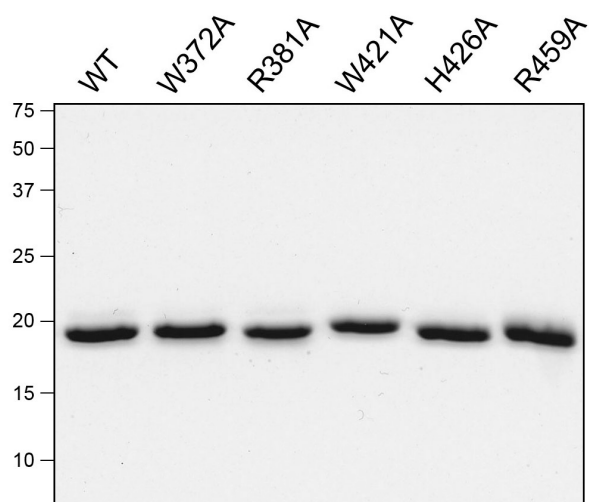

Figure S2. **Recombinant Mmi1 YTH domain mutants.** Purified wild-type Mmi1(319-488) and the indicated alanine mutants were analyzed by SDS-PAGE. The Coomassie blue-stained gel is shown. The positions and sizes (kDa) of marker polypeptides are indicated on the left.
